# Supplementary material for: Photoluminescence of colloids of pristine MgAl layered double hydroxides
Source: Royal Society of Chemistry journal article supplement (doi:10.1039/c4ra01987c), 2014-01-01
Supplement: c4ra01987c1.pdf [file c4ra01987c1.pdf]

Electronic Supplementary Information (ESI) Materials for RSC Advances  
This journal is © The Royal Society of Chemistry 2014

## Photoluminescence of colloids of pristine MgAl layered double hydroxides

Kongli Xu, Zhuang Zhang, Guangming Chen\* and Jianquan Shen

*Beijing National Laboratory for Molecular Sciences (BNLMS), Institute of  
Chemistry, Chinese Academy of Sciences, Beijing 100190, P. R. China. E-mail:  
chengm@iccas.ac.cn.*

\*Corresponding author.

## **Experimental section.**

**Exfoliation.** The decarbonated LDH-NO<sub>3</sub> powdery product was dispersed in formamide in a conical beaker. The system was purged with nitrogen gas and subsequently tightly capped. Then, the dispersion system was ultra-sonicated for 20 min and subsequently stood for 1 day. The translucent dispersion was collected for characterization.

**Characterizations.** X-ray diffraction (XRD) patterns were collected using a Rigaku D/max 2400 diffractometer with Cu K $\alpha$  radiation ( $\lambda = 0.154$  nm) at a scanning rate of 4° min<sup>-1</sup> in  $2\theta$  range of 3–70°. The size and morphology of the LDHs were observed by a HITACHI S-4300 scanning electron microscopy (SEM). Its accelerating voltage was 15 kV. Ultraviolet-visible (UV-vis) absorption spectra were collected in the range from 200 to 800 nm on a Shimadzu UV-1601 spectrophotometer, with a slit width of 5.0 nm. Luminescence spectra were obtained on an F-4500 fluorospectrophotometer with the slit of 5.0 nm. The ranges of emission and excitation spectra were 380-600 nm and 260-420 nm, respectively.

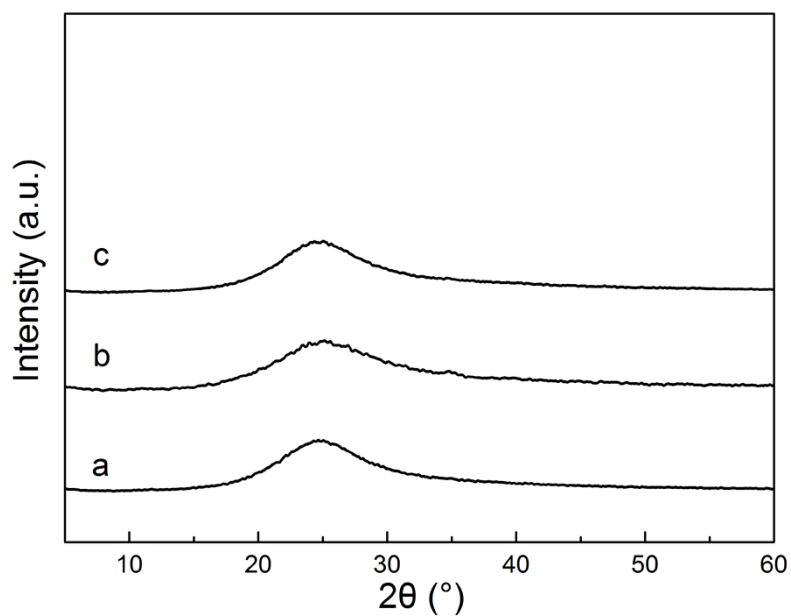

**Figure S1** XRD patterns with wider  $2\theta$  range for the exfoliated MgAl LDH\_NO<sub>3</sub> centrifuged gel-like sediments, wherein the MgAl LDH\_NO<sub>3</sub> samples were obtained after the HNO<sub>3</sub>-NaNO<sub>3</sub> exchange of the MgAl LDH\_CO<sub>3</sub> synthesized *via* (a) urea, (b) urea + NaOH, and (c) urea + HMT method, respectively.
